# Supplementary material
Source: PubMed Central journal article supplement (PMC3154325)
Supplement: NIHMS314191-supplement-SUPplemental.pdf [file NIHMS314191-supplement-SUPplemental.pdf]

# Supplemental Materials for

## ***Single RNA counting reveals alternative modes of gene expression in yeast***

*Daniel Zenklusen, Daniel R. Larson, and Robert H. Singer\**

Department of Anatomy and Structural Biology, Albert Einstein College of Medicine,  
1300 Morris Park Avenue, Bronx, New York, 10461, USA

\* Correspondence: Robert H. Singer  
rhsinger@aecom.yu.edu

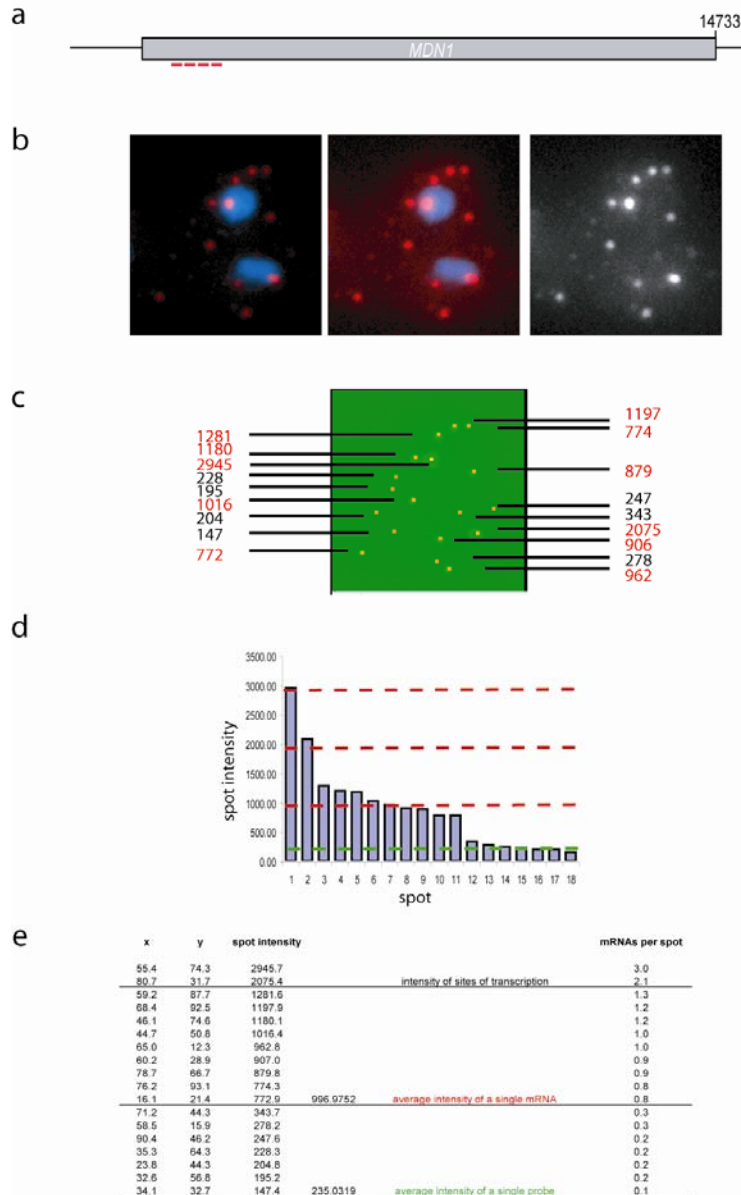

**Supplementary Figure 1:** Intensity of a single mRNA can be calculated by determining the fluorescence intensity emitted from a single probe. (a) FISH probes hybridizing to the 5' end of *MDN1* mRNA we used for hybridization shown in (b). A small number of single probes tend to hybridize unspecifically to the cells what can be visualized by changing the contrast levels (b, compare left and middle panel). The intensity is determined using the same spot detection algorithm as used in Figure 2, but by changing the settings to allow the detection of lower intensity spots (c). Signal intensity of each spot corresponding to a single DNA probe is shown in black, signal intensities of single mRNA and sites of transcription are shown in red. Consistent with the 4 probes used in the hybridization (a), intensity of single mRNA signals in the cytoplasm is 4 times the intensity of a single probe (d, e). Nascent mRNAs at the site of transcription are 2 resp. 3 times the intensity of a single mRNA in the cytoplasm, as also shown in Figure 2d.

## Supplementary Tables

**Supplemental Table 1:** Parameters for the three scenarios of *MDN1* transcription shown in Figure 5.

|                  | <b>Figure 5</b>        |                        |                        |      |         |
|------------------|------------------------|------------------------|------------------------|------|---------|
|                  | a (min <sup>-1</sup> ) | b (min <sup>-1</sup> ) | c (min <sup>-1</sup> ) | c/b  | a/(a+b) |
| <i>MDN1</i> sc 1 | 0.90                   | 2.52                   | 0.60                   | 0.24 | 0.26    |
| <i>MDN1</i> sc 2 | 0.80                   | 0.20                   | 0.20                   | 1.00 | 0.80    |
| <i>MDN1</i> sc 3 | 0.30                   | 0.03                   | 0.17                   | 6.80 | 0.92    |

**Supplemental Table 2:** Parameters used in the numerical simulations. Length is the distance from the most 3' probe to the end of the gene. The critical  $\chi^2$  values are those used in model discrimination. The curves in Figure 3 and 6 are calculated from the tabulated parameters and the numerical model described in Materials and Methods.  $\tau$  is the value which minimizes the nascent chain distribution  $\chi^2$ .

| gene          | length (bases) | nascent chains critical $\chi^2_m$ (P=10%)* | mRNA abundance critical $\chi^2_N$ (P=10%)† | global fit critical $\chi^2_m$ (P=10%)* | a (min <sup>-1</sup> ) | <b>Figure 3,6</b>      |      | $\tau$ (min) |
|---------------|----------------|---------------------------------------------|---------------------------------------------|-----------------------------------------|------------------------|------------------------|------|--------------|
|               |                |                                             |                                             |                                         | b (min <sup>-1</sup> ) | c (min <sup>-1</sup> ) |      |              |
| <i>MDN1</i>   | 13474          | 4.61                                        | 19.81                                       | 25.99                                   | 0.70                   | 0.12                   | 0.19 | 16.75        |
| <i>KAP104</i> | 1645           | 2.71                                        | 15.99                                       | 21.06                                   | 0.70                   | 0.12                   | 0.27 | 3.50         |
| <i>DOA1</i>   | 1701           | 2.71                                        | 14.68                                       | 19.81                                   | 0.70                   | 0.12                   | 0.14 | 2.90         |
| <i>POI1</i>   | 2575           | 4.61                                        | 24.77                                       | 30.81                                   | 0.07                   | 0.68                   | 2.00 | 3.75         |
| <i>PDR5</i>   | 3070           | 17.27                                       | 54.10                                       | 74.40                                   | 0.44                   | 4.70                   | 6.70 | 4.50         |

\* 4 free parameters: *a*, *b*, *c*,  $\tau$

† 3 free parameters: *a*, *b*, *c*

**Supplemental Table 3:** Parameters for the three genes in Figure 7.

|             | <b>Figure 7<br/>black circles</b> |                        |                        |                             |                             |
|-------------|-----------------------------------|------------------------|------------------------|-----------------------------|-----------------------------|
|             | a (min <sup>-1</sup> )            | b (min <sup>-1</sup> ) | c (min <sup>-1</sup> ) | X <sup>2</sup> <sub>m</sub> | X <sup>2</sup> <sub>N</sub> |
| <i>MDN1</i> | 0.80                              | 0.20                   | 0.20                   | 1.94                        | 2.14                        |
| <i>POL1</i> | 0.06                              | 0.08                   | 0.32                   | 4.42                        | 24.25                       |
| <i>PDR5</i> | 0.44                              | 4.70                   | 6.70                   | 10.60                       | 50.80                       |

|             | <b>Figure 7<br/>blue circles</b> |                        |                        |                             |                             |
|-------------|----------------------------------|------------------------|------------------------|-----------------------------|-----------------------------|
|             | a (min <sup>-1</sup> )           | b (min <sup>-1</sup> ) | c (min <sup>-1</sup> ) | X <sup>2</sup> <sub>m</sub> | X <sup>2</sup> <sub>N</sub> |
| <i>MDN1</i> | 0.30                             | 2.28                   | 1.30                   | 16.13                       | 6.28                        |
| <i>POL1</i> | 0.07                             | 0.68                   | 2.00                   | 21.04                       | 9.50                        |
| <i>PDR5</i> | 0.30                             | 5.30                   | 11.30                  | 36.19                       | 32.32                       |

**Supplemental Table 4:** Summary of the expression state of genes measured in this study and compared to Holstege et al.<sup>1</sup> and Ghaemmaghami et al.<sup>2</sup>.

|                            | <i>gene</i>              | <b><i>MDN1</i></b>      | <b><i>DOA1</i></b>      | <b><i>KAP104</i></b>    | <b><i>POL1</i></b>      | <b><i>PDR5</i></b>       |
|----------------------------|--------------------------|-------------------------|-------------------------|-------------------------|-------------------------|--------------------------|
| <i>in situ</i>             | <i>average</i>           | <b>6.12 +/-</b><br>0.42 | <b>2.59 +/-</b><br>0.53 | <b>4.93 +/-</b><br>0.59 | <b>3.13 +/-</b><br>0.59 | <b>13.4 +/-</b><br>1.2   |
|                            | <i>stdev</i>             | <b>2.80 +/-</b><br>0.21 | <b>1.61 +/-</b><br>0.35 | <b>2.36 +/-</b><br>0.35 | <b>3.56 +/-</b><br>0.64 | <b>10.16 +/-</b><br>0.97 |
|                            | <hr/>                    |                         |                         |                         |                         |                          |
| <i>Holstege et al.</i>     | <i>mRNAs per cell</i>    | 1.20                    | 1.10                    | 0.80                    | 0.70                    | 12                       |
| <i>Ghaemmaghami et al.</i> | <i>proteins per cell</i> | 538                     | 6800                    | 2130                    | 1050                    | 42000                    |

## Supplemental Table 5: FISH probes used in this study.

Probes used in this study are listed below. Bold letters show modified bases labeled with either cy3 cy3.5 or cy5. A schematic view of the position of the probes on the corresponding mRNAs is shown in Figures 3, 4 and 6.

|                      |                                                                        |
|----------------------|------------------------------------------------------------------------|
| <b>MDN1 region 1</b> |                                                                        |
| MDN1 794             | TTT GTC GTG GAT AGT GTG GAC CTT AGG GAC GAT AAC GCC ACA GAT TGA CG     |
| MDN1 860             | CTC CCG AGT TGA CGA AGA GAG GAA ACC GTT TTA TGA GTA GGG ACA AAG GTT    |
| MDN1 1104            | CTA TAA GTA CCC ATC TCC CTT CTT TGA CCG CGG TAG CGA GAA CAC CAG CTC    |
| MDN1 1210            | TTT GCA GCC TTT ACA GTC TCT CCT CTG GAT GGA ATG GTT AGT TCG CGC TT     |
| <b>MDN1 region 2</b> |                                                                        |
| MDN1 4350            | CAC CTT TCT GCA AGA AGC ATA TAG CCA CTG GCA GCA AGC TGC TCA TAT CC     |
| MDN1 4511            | CTA AGA CGG ATA GTC GGC GCA TTC CTT TTG TCC AAG TAA CAG AGC CAA TG     |
| MDN1 5028            | AGG CTA TCG GAT GAA CCC TGT TCT GCT AAC AAC AAA CTC CTT TCT GGC TC     |
| MDN1 5286            | ATG ACA CCA CTT GTT GCA TTT CCG CCT CCC AGC TTC TTG CCA AAC CAT TC     |
| <b>MDN1 region 3</b> |                                                                        |
| MDN1 8912            | GTA GGT TAG GTG AAC ACT TGA TAG TGG AGG AAA GTA GCA ATT CTG CGT CAC TA |
| MDN1 9393            | ATA GAC ATG CCT GTA CGA TAT ACC CTA GGG GAT TGA GGT GCG TCG TCA TC     |
| MDN1 9204            | ATT GCC GGA TCA TAG GGA GAA TCT GGG ACG AAT AGC AGA AGC AAA CCT GT     |
| MDN1 10551           | GTG TTA TTC AGG GAT ACT TCC GAG GAA GCG TAT TTT TCC CAT TCA GCT AG     |
| <b>MDN1 region 4</b> |                                                                        |
| MDN1 13668           | ATC CTG ACT TTT TGC TGT CAA CGT CAT TGT TAG CGT CAT GCG CGT CGA TA     |
| MDN1 13576           | TCG GCG TCT TCT ACT AAC TCT TTC TGG TCC ACT TCT TGC TCC TCC CTA TC     |
| MDN1 13232           | ATT CTG AGT CGT TCC TGA ACC TCC AAC ATC GTC CTG TTC TTG TGT GTC CG     |
| MDN1 13111           | ATC AGC CTT TTC CTC AAC GCC ATC AAG ACC TTC TGT ATT CTG CTC ACC TCC    |
| <b>KAP104</b>        |                                                                        |
| KAP104 99            | CTA GTT GCA ACA CAT AGT CTT CGG CGG GCT TCC ATG TCG ATG CCA TCT TT     |
| KAP104 425           | ATA CCG GCG GTA GCT CTA TTG TTC TGA AGA TCC TGT AGG GAG TAG TGT TG     |
| KAP104 1421          | CCT GCC TCT TTC TTT TTC ACA ATA CGG GGT GCA ATG GGC TTG ATG TCC TC     |
| KAP104 2870          | AGT CCT TCT CAG GCA CTA CTA TTG TCG GGT CTT GAT GTG ATT TGG CTT CC     |
| <b>DOA1</b>          |                                                                        |
| DOA1 555             | GTT CCA TCC CTC GAA ACA CTA GCA ACC TTT GAA TCA TCC ACA GCT ACC AC     |
| DOA1 614             | ATC CTT GTC CTG TAT AAA CTA CCG TAC CGA GCC ATT GGT CAT CTT TAG ACC AC |
| DOA1 899             | CTG AGA AGG ATA CGA CTT TGG CAT CCC ATA CAG AGG CAT TGT GTG CTT GC     |
| <b>POL1</b>          |                                                                        |
| POL1 1856            | CGC TAG ATA AAT CCG ATG GAA TGG TGT CTC GAC TGG ACT TCG GTG TTT GG     |
| POL1 2034            | GTA GGC GTG ATA TTC TGA GGC TTA TCT ACC GAA ACT TCA ACC GCA CAG TG     |
| POL1 2283            | CTG ACT CTA CCG GGT AGT TTC TGT TTT GCC AGT GCA GCT AAA CCT AAT GG     |
| <b>PDR5</b>          |                                                                        |
| PDR5 111             | TCT GTG CGG TCA GAG TCC TTG CCA GTT TTT GGA TTC GAG CTT CTG TAT GC     |
| PDR5 219             | CTG GAG CTT CAG GAT CAG AGA ATA TCG GGT TTA CAC CTT CCA CAC CGC TA     |
| PDR5 797             | AGA ACT TAA GTG CTT CTG GTG CTT CCG CAG ATG TCG CCT ATC AGT CAA CT     |
| PDR5 1417            | TTG GAC TGC TTA GCA ATG TGG GCT TCC TTA ATA GCT TCA CGG CTT GCT TC     |
| <b>CCW12</b>         |                                                                        |
| CCW12-59             | GGT GAC CAA AGT GGT AGA TTC TTG GCT GAC AGT AGC AGT GGT AAC GTT AG     |
| CCW12-140            | GTC ATC GAC GGT GAC GGT AGC GGT GGA AAC CAA AGC TGG GGA GAC AGT TT     |
| CCW12-191            | CTT TGG GGC TTC AGT GGT CAA TGG GCA CCA GGT GGT GTA TTG AGT GAT AA     |
| CCW12-245            | GGT GTT CTT TGG AGC TTC AGT AGA GGT AAC TGG AGC AGC AGT AGA AGT AC     |
| <b>rRNA-ITS2</b>     |                                                                        |
| ITS2-1               | ATA GGC CAG CAA TTT CAA GTT AAC TCC AAA GAG TAT CAC TC                 |

1. Holstege, F.C. et al. Dissecting the regulatory circuitry of a eukaryotic genome. *Cell* **95**, 717-28 (1998).
2. Ghaemmaghmi, S. et al. Global analysis of protein expression in yeast. *Nature* **425**, 737-41 (2003).
